# Supplementary material for: RuTe/M (M = Pt, Pd) nanoparticle nanotubes with enhanced electrocatalytic activity
Source: Royal Society of Chemistry journal article supplement (doi:10.1039/c5ta03395k), 2015-01-01
Supplement: c5ta03395k1.pdf [file c5ta03395k1.pdf]

## Electronic Supplementary Information for :

# **RuTe/M (M=Pt, Pd) nanoparticle nanotubes with enhanced electrocatalytic activity**

Wei Hong,<sup>a, b</sup> Jin Wang,<sup>\* a, c</sup> and Erkang Wang<sup>\* a, b</sup>

<sup>a</sup> State Key Laboratory of Electroanalytical Chemistry, Changchun Institute of Applied Chemistry, Chinese Academy of Sciences, Changchun, 130022, China

<sup>b</sup> University of Chinese Academy of Sciences, Beijing, 100039, China

<sup>c</sup> Department of Chemistry and Physics, State University of New York at Stony Brook, New York, NY 11794-3400, USA.

\*Corresponding author. Fax: (+86) 43185689711, E-mail address: jin.wang.1@stonybrook.edu, ekwang@ciac.ac.cn.

## 1. Experimental Section

**Synthesis of RuTe/Pd nanotubes.** 2 mL of the above prepared RuTe nanotubes and 30 mg of PVP were mixed into 10 mL of water and stirred for 10 min. Then, 0.2 mL of H<sub>2</sub>PdCl<sub>4</sub> (56.4 mmol L<sup>-1</sup>) was added to the mixture. Sequentially, 1 mL of AA (0.1 mol L<sup>-1</sup>) were added into the above reaction and react for 30 min. After that, the product was collected by centrifugation and washed several times with water for further characterization and electrochemical measurements.

**Synthesis of RuTe/PdPt nanotubes.** 2 mL of the above prepared RuTe nanotubes and 30 mg PVP were mixed into 15 mL of ethylene glycol and stirred for 10 min. Then, 0.1 mL of H<sub>2</sub>PdCl<sub>4</sub> (56.4 mmol L<sup>-1</sup>) and 0.3 mL of H<sub>2</sub>PtCl<sub>6</sub> (19.3 mmol L<sup>-1</sup>) was added to the mixture. Sequentially, 1 mL of AA (0.1 mol L<sup>-1</sup>) were added into the above mixture and react for 20 min in a water bath which maintained at 60 °C. After that, the product was collected by centrifugation, and washed several times with water for further characterization and electrochemical measurements.

**Synthesis of RuTe/PdAu nanotubes.** 2 mL of the above prepared RuTe nanotubes and 30 mg of PVP were mixed into 15 mL of ethylene glycol and stirred for 10 min. Then, a mixture containing 0.1 mL of  $\text{H}_2\text{PdCl}_4$  ( $56.4 \text{ mmol L}^{-1}$ ) and 0.056 mL of  $\text{HAuCl}_4$  ( $0.1 \text{ mol L}^{-1}$ ) was added to the mixture. Sequentially, 1 mL of AA ( $0.1 \text{ mol L}^{-1}$ ) were added into the above solution and react for 1 hours. After that, the product was collected by centrifugation and washed several times with water for further characterization and electrochemical measurements.

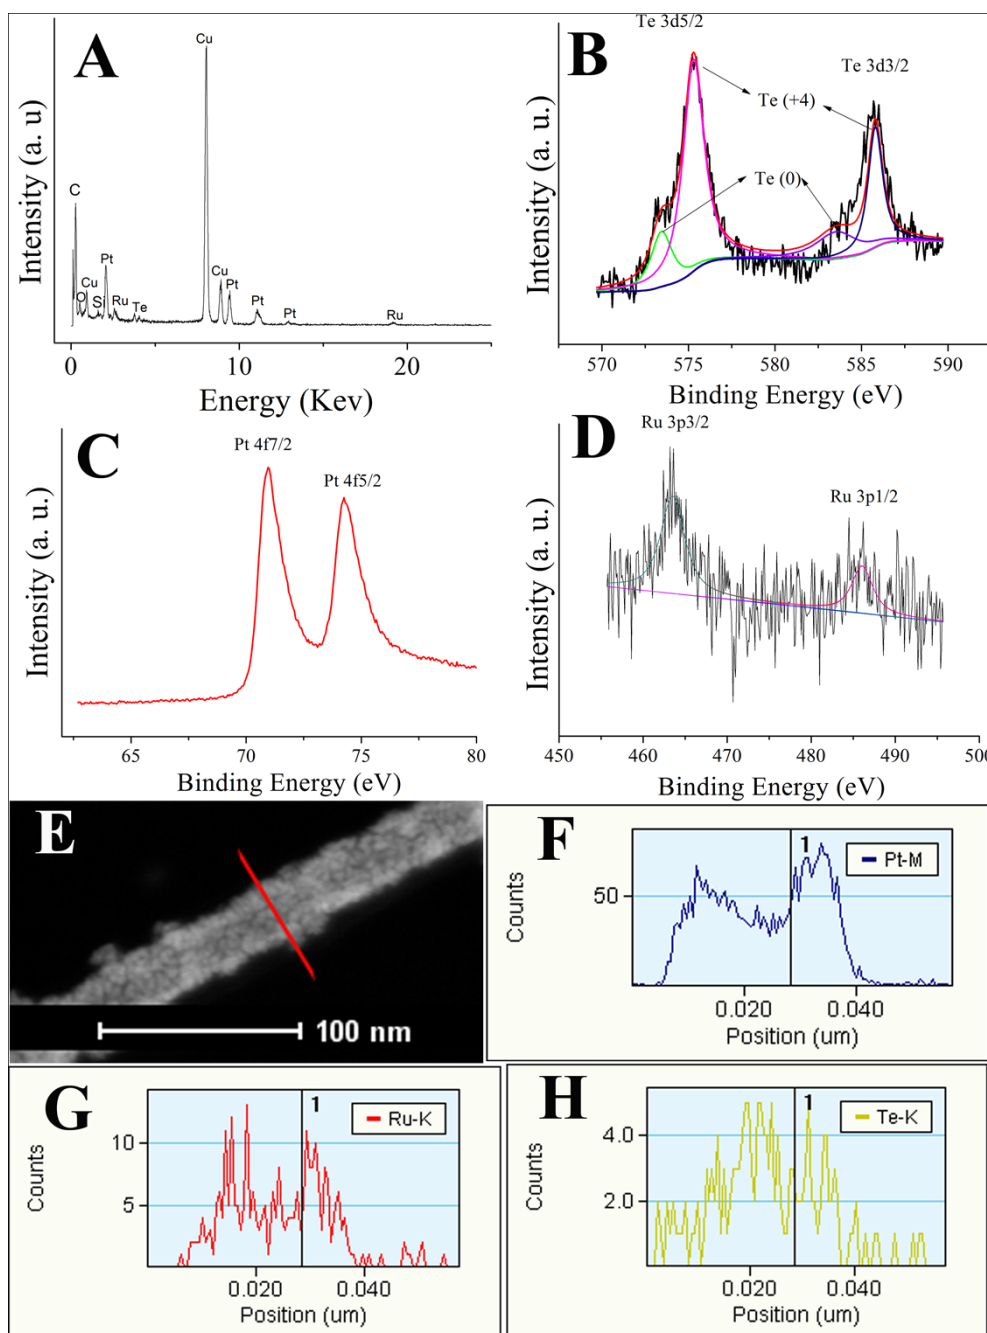

**Fig. S1** (A) EDS of the as-prepared RuTe nanotubes. The peaks of Cu were originated from the carbon coated copper grid. XPS spectra of as-prepared RuTe/Pt nanotubes: Te 3d (B), Pt 4f (C) and Ru 3p (D). (E) HAADF-STEM images of RuTe/Pt nanotubes. The cross-sectional compositional line profiles of individual RuTe/Pt nanotubes: Pt-M (F), Ru-K (G) and Te-K (H).

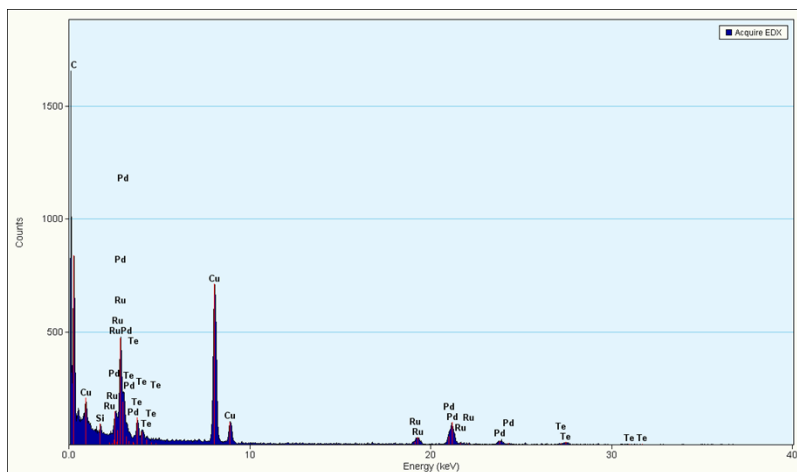

**Fig. S2 (A)** EDS of the as-prepared RuTe/Pd nanotubes. The peaks of Cu were originated from the carbon coated copper grid

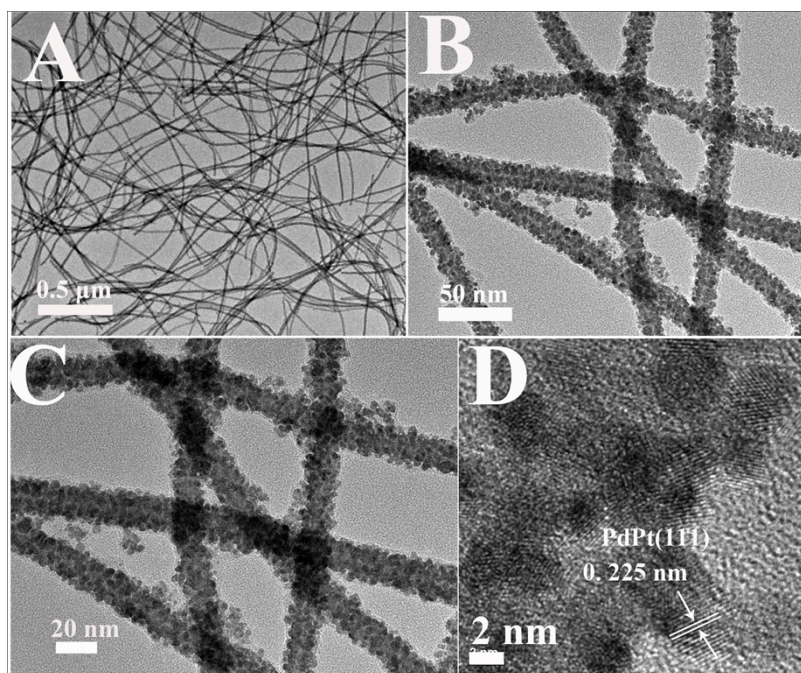

**Fig. S3.** (A, B, C) Typical TEM images, of the prepared RuTe/PdPt nanotubes with different magnifications. (D) High-resolution TEM images of the as-prepared RuTe/PdPt nanotubes.

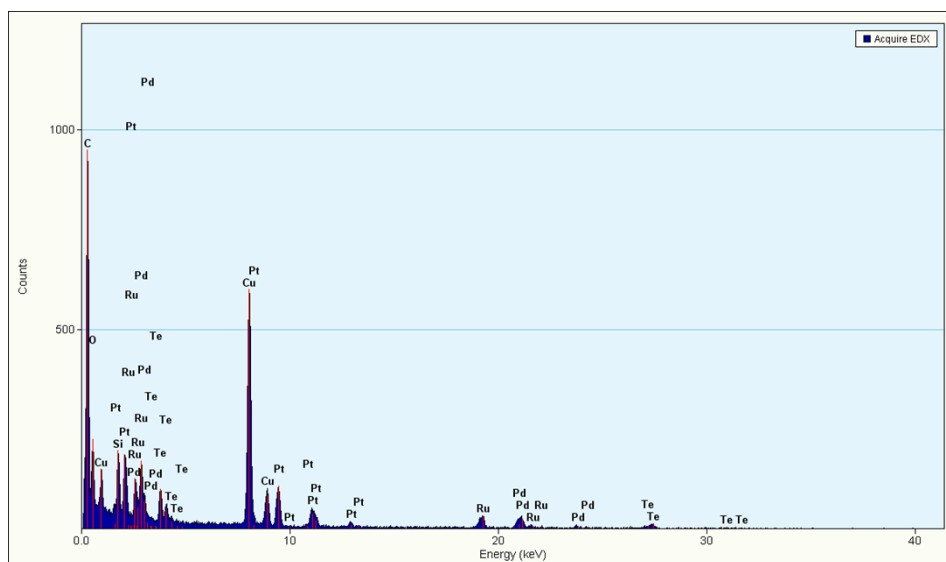

**Fig. S4** EDS of the as-prepared RuTe/PdPt nanotubes. The peaks of Cu were originated from the carbon coated copper grid.

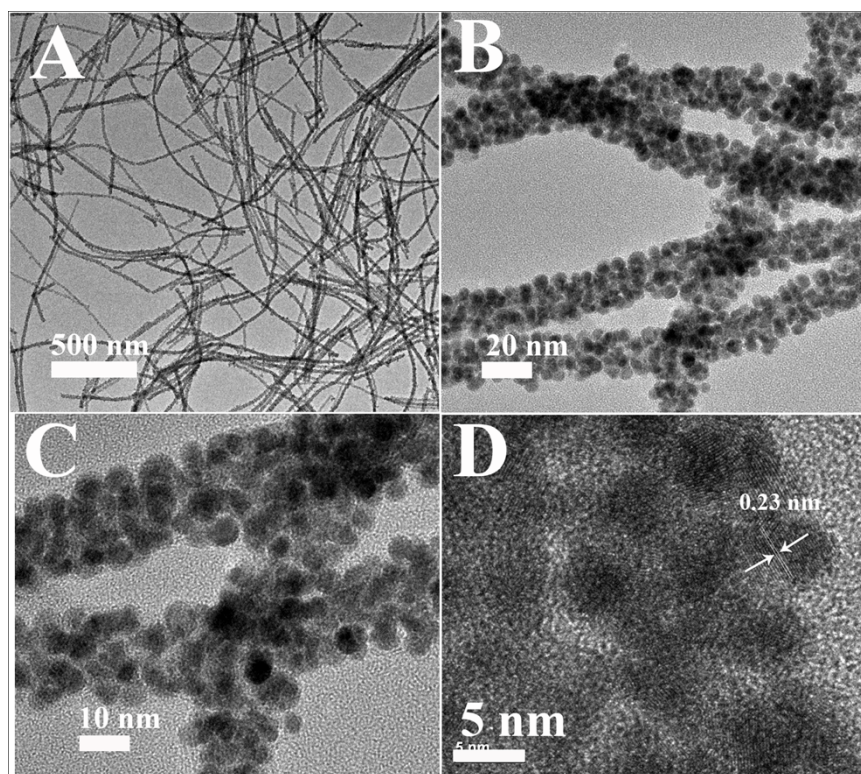

**Fig. S5.** (A, B, C) Typical TEM images of the as-prepared RuTe/PdPAu nanotubes with different magnifications. (D) High-resolution TEM images of the as-prepared RuTe/PdAu nanotubes.

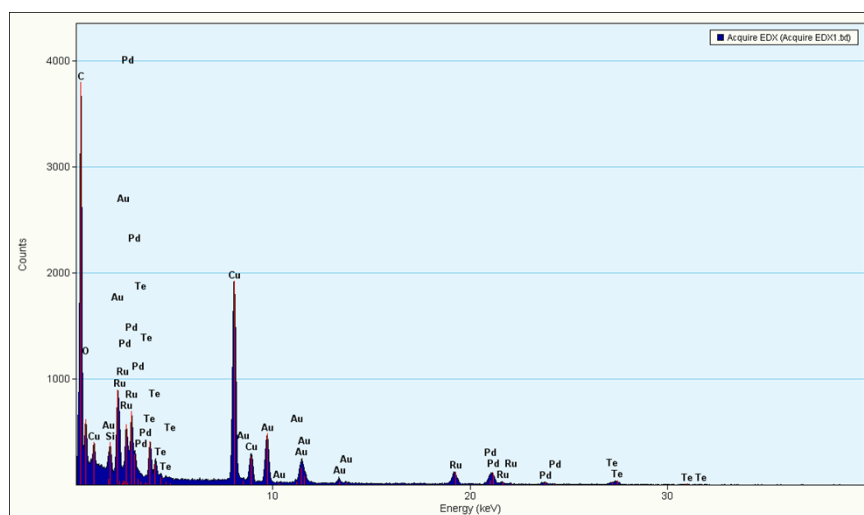

**Fig. S6** EDS of the as-prepared RuTe/PdAu nanotubes. The peaks of Cu were originated from the carbon coated copper grid.

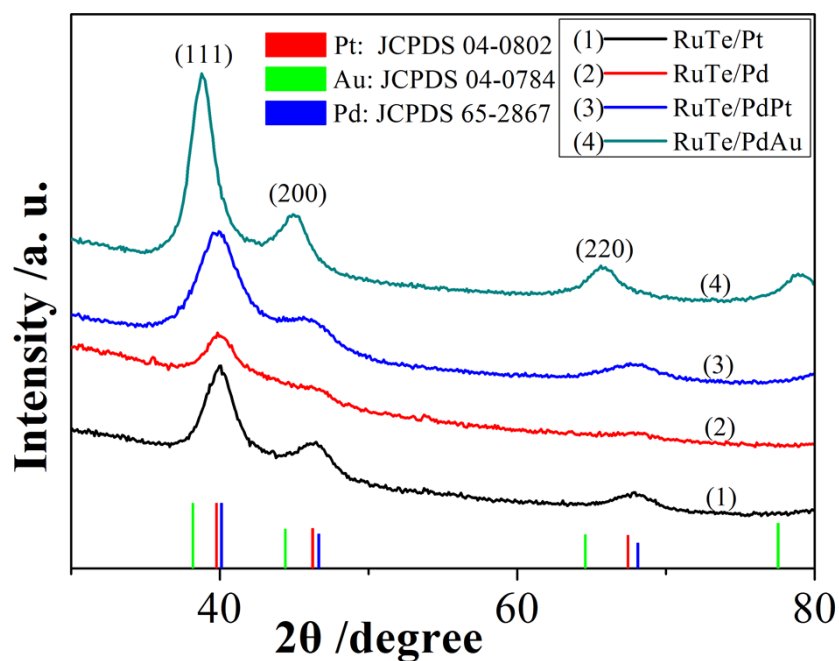

**Fig. S7** XRD patterns of the as-synthesized nanotubes (1) RuTe/Pt, (2) RuTe/Pd, (3) RuTe/PdPt and (4) RuTe/PdAu. The intensity and position for Pt, Pd and Au references were taken from the JCPDS database.

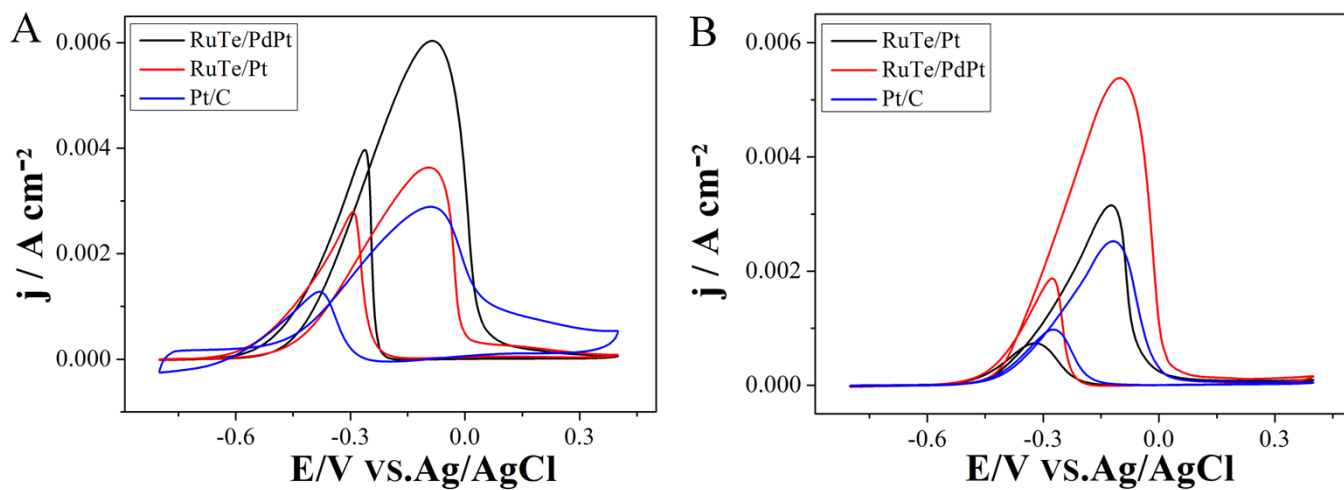

**Fig. S8** Specific catalytic activity of RuTe/PdPt, RuTe/Pt NTs and Pt/C for (A) ethanol and (B) methanol electrooxidation, respectively. The current densities have been normalized by the ECSA.

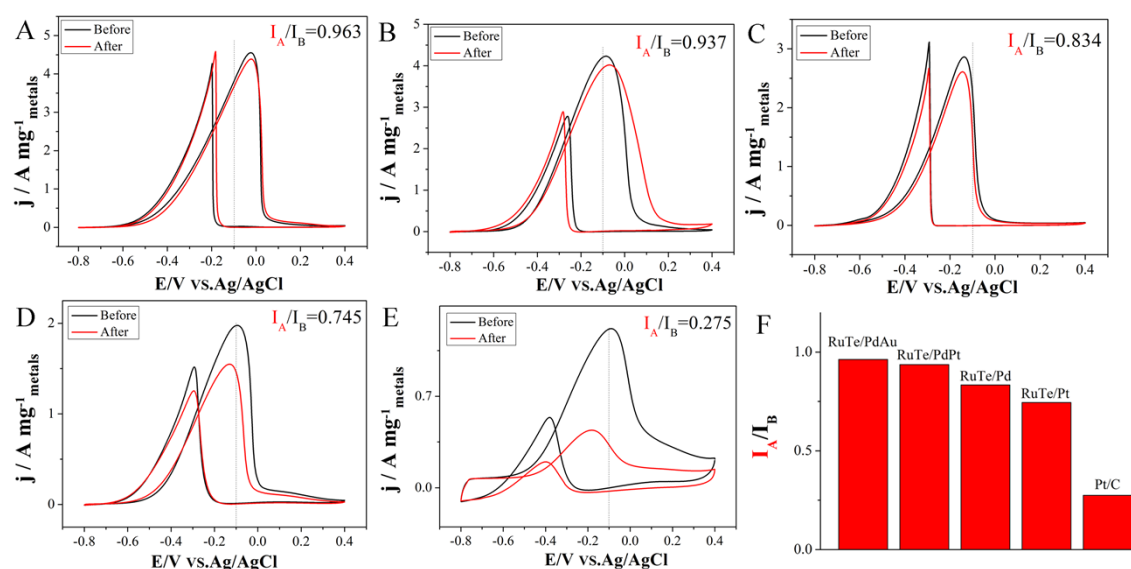

**Fig. S9** Ethanol electrooxidation CV curves of before (black) and after i-t tsets (red) on various materials modified electrodes, (A) RuTe/PdAu NTs; (B) RuTe/PdPt NTs; (C) RuTe/Pd NTs; (D) RuTe/Pt NTs; (E) Pt/C.  $I_A$  is the current value recorded at -0.1 V after the i-t tests,  $I_B$  is the current value recorded at -0.1 V before the i-t tests. (F) The comparison of  $I_A/I_B$  value of various materials for ethanol electrooxidation.

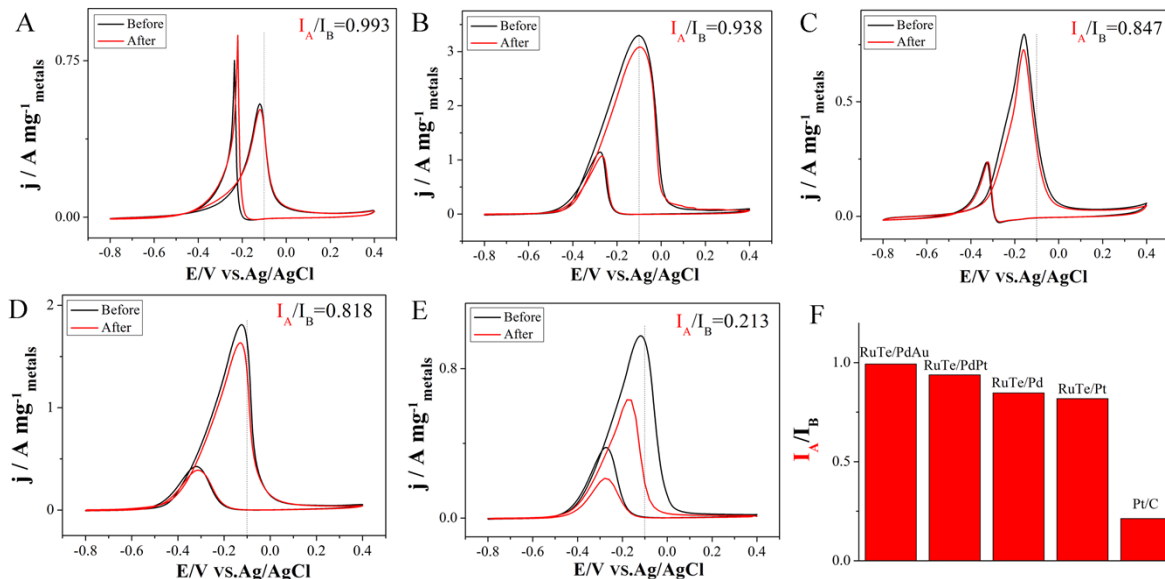

**Fig. S10** Methanol electrooxidation CV curves of before (black) and after i-t tsets (red) on various materials modified electrodes, (A) RuTe/PdAu NTs; (B) RuTe/PdPt NTs; (C) RuTe/Pd NTs; (D) RuTe/Pt NTs; (E) Pt/C.  $I_A$  is the current value recorded at -0.1 V after the i-t tests,  $I_B$  is the current value recorded at -0.1 V before the i-t tests. (F) The comparison of  $I_A/I_B$  value of various materials for methanol electrooxidation.



**Table S1**

| RuTe/Pt                                            | RuTe/Pd                                             | RuTe/PdPt                                                            | RuTe/PdAu                                                           |
|----------------------------------------------------|-----------------------------------------------------|----------------------------------------------------------------------|---------------------------------------------------------------------|
| Ru <sub>8</sub> Te <sub>11</sub> /Pt <sub>82</sub> | Ru <sub>10</sub> Te <sub>19</sub> /Pd <sub>74</sub> | Ru <sub>10</sub> Te <sub>19</sub> /Pd <sub>23</sub> Pt <sub>24</sub> | Ru <sub>9</sub> Te <sub>17</sub> /Pd <sub>33</sub> Au <sub>37</sub> |

**Table S2.** Cyclic voltammetric characteristics of ethanol electrooxidation in basic solution modified with various nanomaterials. The scan rate was 50 mV s<sup>-1</sup>.

| Electrode                                                       | Test Conditions                                      | E <sub>f</sub><br>(mV vs<br>Ag/AgCl) | E <sub>b</sub><br>(mV vs<br>Ag/AgCl) | I <sub>f</sub><br>(A mg <sup>-1</sup> of<br>metals) | I <sub>b</sub><br>(A mg <sup>-1</sup> of<br>metals) |
|-----------------------------------------------------------------|------------------------------------------------------|--------------------------------------|--------------------------------------|-----------------------------------------------------|-----------------------------------------------------|
| RuTe/PdAu NTs<br>[this work]                                    | 0.5 M NaOH+1 M<br>CH <sub>3</sub> CH <sub>2</sub> OH | -30                                  | -210                                 | 4.6                                                 | 4.3                                                 |
| RuTe/PdPt NTs<br>[this work]                                    | 0.5 M NaOH+1 M<br>CH <sub>3</sub> CH <sub>2</sub> OH | -90                                  | -270                                 | 4.2                                                 | 2.8                                                 |
| RuTe/Pd NTs<br>[this work]                                      | 0.5 M NaOH+1 M<br>CH <sub>3</sub> CH <sub>2</sub> OH | -140                                 | -300                                 | 2.9                                                 | 3.1                                                 |
| RuTe/Pt NTs<br>[this work]                                      | 0.5 M NaOH+1 M<br>CH <sub>3</sub> CH <sub>2</sub> OH | -91                                  | -300                                 | 2.0                                                 | 1.5                                                 |
| Pd <sub>45</sub> Pt <sub>55</sub> NWs <sup>[1]</sup>            | 0.5 M NaOH+1 M<br>CH <sub>3</sub> CH <sub>2</sub> OH | ~-50                                 | ~-210                                | 0.9                                                 | 1                                                   |
| Pt NTs <sup>[1]</sup>                                           | 0.5 M NaOH+1 M<br>CH <sub>3</sub> CH <sub>2</sub> OH | ~0                                   | ~-250                                | 0.5                                                 | 0.5                                                 |
| Pd <sub>67</sub> Pt <sub>33</sub><br>nanosponges <sup>[2]</sup> | 0.5 M NaOH+1 M<br>CH <sub>3</sub> CH <sub>2</sub> OH | ~-100                                | ~-200                                | 1.6                                                 | 1.8                                                 |
| Pd<br>nanomembranes <sup>[2]</sup>                              | 0.5 M NaOH+1 M<br>CH <sub>3</sub> CH <sub>2</sub> OH | ~-140                                | ~-290                                | ~0.58                                               | 0.9                                                 |
| Pt/Pd NTs <sup>[4]</sup>                                        | 0.5 M NaOH+1 M<br>CH <sub>3</sub> CH <sub>2</sub> OH | 0                                    | ~-230                                | 1                                                   | 0.75                                                |
| Pd/rGO/CFP <sup>[5]</sup>                                       | 0.5 M NaOH+1 M<br>CH <sub>3</sub> CH <sub>2</sub> OH | ~-100                                | ~-500                                | 0.8                                                 | 0.18                                                |
|                                                                 |                                                      |                                      |                                      |                                                     |                                                     |
| PdAu (Pd 65%)<br>BHT <sup>[6]</sup>                             | 1 M KOH+1 M<br>CH <sub>3</sub> CH <sub>2</sub> OH    | ~-50                                 | ~-150                                | 1.2                                                 | 1.1                                                 |
| Pd/PANI/Pd <sup>[7]</sup>                                       | 1 M KOH+1 M<br>CH <sub>3</sub> CH <sub>2</sub> OH    | ~-200                                | ~-380                                | 0.35                                                | 0.4                                                 |
| Pd <sub>0.5</sub> Cu <sub>0.5</sub> <sup>[8]</sup>              | 1 M KOH+1 M<br>CH <sub>3</sub> CH <sub>2</sub> OH    | ~-200                                | ~-400                                | 1.6                                                 | -                                                   |
| PdCu/3DGS <sup>[9]</sup>                                        | 1 M KOH+1 M<br>CH <sub>3</sub> CH <sub>2</sub> OH    | ~-100                                | ~-400                                | 1.2                                                 | 0.6                                                 |
| Pt/PdCu/3DGF <sup>[10]</sup>                                    | 1 M KOH+1 M<br>CH <sub>3</sub> CH <sub>2</sub> OH    | ~-50                                 | ~-250                                | 3.0                                                 | 2.4                                                 |

Notes: NTs= nanotubes; NWs= nanowires; BHT= bimetallic nanoparticles heterostructure tubes; PANI= polyaniline; rGO= reduced graphene oxide; CFP= flexible carbon fiber paper; 3DGS=3D graphene sheets; 3DGF=3D graphene framework.

**Table S3**

**(A)** Cyclic voltammetric characteristics of Pt-based materials toward methanol electrooxidation in basic solution modified with various nanomaterials. The scan rate was 50 mV s<sup>-1</sup>.

| Electrode                                         | Test Conditions                | E <sub>f</sub><br>(mV vs<br>Ag/AgCl) | E <sub>b</sub><br>(mV vs<br>Ag/AgCl) | I <sub>f</sub><br>(A mg <sup>-1</sup> of<br>metals) | I <sub>b</sub><br>(A mg <sup>-1</sup> of<br>metals) |
|---------------------------------------------------|--------------------------------|--------------------------------------|--------------------------------------|-----------------------------------------------------|-----------------------------------------------------|
| RuTe/PdPt NTs [this work]                         | 1 M KOH+1 M CH <sub>3</sub> OH | -100                                 | -280                                 | 3.3                                                 | 1.2                                                 |
| RuTe/Pt NTs [this work]                           | 1 M KOH+1 M CH <sub>3</sub> OH | -130                                 | -320                                 | 1.8                                                 | 0.45                                                |
| Pd <sub>45</sub> Pt <sub>55</sub> NWS [1]         | 1 M KOH+1 M CH <sub>3</sub> OH | ~0                                   | ~-300                                | 2                                                   | 0.6                                                 |
| Pt/1-AP-rGO [11]                                  | 1 M KOH+1 M CH <sub>3</sub> OH | ~-200                                | ~-300                                | 0.8                                                 | 0.25                                                |
| Pt/rGO [11]                                       | 1 M KOH+1 M CH <sub>3</sub> OH | ~-200                                | ~-300                                | 0.4                                                 | 0.15                                                |
| N-Pt/RGO/CF [12]                                  | 1 M KOH+1 M CH <sub>3</sub> OH | ~-150                                | ~-400                                | 1.1                                                 | 0.18                                                |
| Pd <sub>50</sub> Pt <sub>50</sub> nanosponges [2] | 1 M KOH+1 M CH <sub>3</sub> OH | ~-100                                | ~-300                                | 2.2                                                 | 0.8                                                 |

**(B)** Cyclic voltammetric characteristics of noble-Pt-based materials toward methanol electrooxidation in basic solution modified with various nanomaterials. The scan rate was 50 mV s<sup>-1</sup>.

| Electrode                                                      | Test Conditions                | E <sub>f</sub><br>(mV vs<br>Ag/AgCl) | E <sub>b</sub><br>(mV vs<br>Ag/AgCl) | I <sub>f</sub><br>(A mg <sup>-1</sup> of<br>metals) | I <sub>b</sub><br>(A mg <sup>-1</sup> of<br>metals) |
|----------------------------------------------------------------|--------------------------------|--------------------------------------|--------------------------------------|-----------------------------------------------------|-----------------------------------------------------|
| RuTe/PdAu NTs [this work]                                      | 1 M KOH+1 M CH <sub>3</sub> OH | -120                                 | -240                                 | 0.54                                                | 0.75                                                |
| RuTe/Pd NTs [this work]                                        | 1 M KOH+1 M CH <sub>3</sub> OH | -160                                 | -330                                 | 0.8                                                 | 0.25                                                |
| Supported Pd <sub>30</sub> Au <sub>70</sub> nanoparticles [13] | 1 M KOH+1 M CH <sub>3</sub> OH | ~0                                   | ~-150                                | ~0.17                                               | ~0.24                                               |
| G-AuPd@Pd [14]                                                 | 1 M KOH+1 M CH <sub>3</sub> OH | ~200                                 | ~-350                                | 0.65 (interms of Pd)                                | -                                                   |
| G-Pd [14]                                                      | 1 M KOH+1 M CH <sub>3</sub> OH | -150                                 | -300                                 | 0.22                                                | -                                                   |

Notes: NTs=nanotubes; NWS=nanowires; Pt/1-AP-rGO=Pt nanoparticle-loaded 1-aminopyrene functionalized reduced graphene oxide composites; Pt/rGO=Pt nanoparticle-loaded reduced graphene oxide composites; N-Pt/RGO/CF=three-dimensional multilayered Pt/reduced graphene oxide modified carbon fiber electrode; G=graphene.

## References

- 1 C. Zhu, S. Guo, S. Dong, *Adv. Mater.*, 2012, **24**, 2326-2331.
- 2 C. Zhu, S. Guo, S. Dong, *Chem. Eur. J.*, 2013, **19**, 1104-1111.
- 3 H. Wu, H. Li, Y. Zhai, X. Xu, Y. Jin, *Adv. Mater.*, 2012, **24**, 1594-1597.
- 4 S. Guo, S. Dong, E. Wang, *Energy Environ. Sci.*, 2010, **3**, 1307-1310.
- 5 M. Sawangphruk, A. Krittayavathananon, N. Chinwipas, *J. Mater. Chem. A*, 2013, **1**, 1030-1034.
- 6 C.-H. Cui, J.-W. Yu, H.-H. Li, M.-R. Gao, H.-W. Liang, S.-H. Yu, *ACS Nano*, 2011, **5**, 4211-4218.
- 7 A. L. Wang, H. Xu, J. X. Feng, L. X. Ding, Y. X. Tong, G. R. Li, *J. Am. Chem. Soc.*, 2013, **135**, 10703-10709.
- 8 J. Mao, Y. Liu, Z. Chen, D. Wang, Y. Li, *Chem. Commun.*, 2014, **50**, 4588-4591.
- 9 C. Hu, X. Zhai, Y. Zhao, K. Bian, J. Zhang, L. Qu, H. Zhang, H. Luo, *Nanoscale*, 2014, **6**, 2768-2775.
- 10 C. Hu, H. Cheng, Y. Zhao, Y. Hu, Y. Liu, L. Dai, L. Qu, *Adv. Mater.*, 2012, **24**, 5493-5498.
- 11 D. Liu, L. Yang, J. S. Huang, Q. H. Guo, T. Y. You, *RSC Adv.*, 2014, **4**, 13733-31737.
- 12 Z. Yao, R. Yue, C. Zhai, F. Jiang, H. Wang, Y. Du, C. Wang, P. Yang, *Int. J. Hydrogen Energy*, 2013, **38**, 6368-6376.
- 13 Z. Yin, M. Chi, Q. Zhu, D. Ma, J. Sun, X. Bao, *J. Mater. Chem. A*, 2013, **1**, 9157-9163.
- 14 J.-N. Zheng, S.-S. Li, X. Ma, F.-Y. Chen, A.-J. Wang, J.-R. Chen, J.-J. Feng, *J. Power Sources*, 2014, **262**, 270-278.
